# Supplementary material for: Incidence, Mortality, Disability-Adjusted Life Years, and Trends of Prostate Cancer in Mexico from 2000 to 2019: Results from the Global Burden of Disease Study 2019
Source: Preprints.org preprint supplement (doi:10.20944/preprints202205.0084.v1), 2022-05-06
Supplement: Supplementary file 2 [file supplementary]

**Supplementary Table 1.** Estimates of prostate cancer incidence at the national and subnational levels in Mexico.

| **Incidence** | **Counts (95% UI)** | | | **Percentage change counts 2010 to 2019** | **ASR (per 100,000)** |
| --- | --- | --- | --- | --- | --- |
| 2000 | 2010 | 2019 | 2019 |
| **National** | 11444 (8883-14016) | 17784 (14346-23397) | 27096 (20602-36016) | 52.4 (24.0-88.0) | 52.3 (40.0-70.1) |
| Aguascalientes | 91 (75-119) | 154 (120-201) | 260 (190-355) | 69.0 (28.9-118.5) | 52.7 (38.3-71.8) |
| Baja California | 288 (171-338) | 471 (316-552) | 844 (568-1154) | 79.4 (34.3-134.4) | 62.3 (42.7-84.5) |
| Baja California Sur | 58 (38-68) | 99 (68-118) | 207 (135-294) | 110.0 (55.1-190.2) | 74.9 (49.7-104.0) |
| Campeche | 69 (57-101) | 119 (99-171) | 165 (119-250) | 39.1 (5.4-82.2) | 42.6 (30.8-64.4) |
| Chiapas | 289 (194-340) | 529 (357-618) | 821 (572-1097) | 55.0 (17.6-102.8) | 41.3 (28.7-55.0) |
| Chihuahua | 377 (254-436) | 537 (363-628) | 837 (521-1162) | 55.8 (18.0-102.1) | 60.4 (37.8-83.2) |
| Coahuila | 292 (212-347) | 423 (336-569) | 665 (479-930) | 57.1 (18.6-107.2) | 52.6 (38.1-73.4) |
| Colima | 74 (52-87) | 122 (91-148) | 206 (135-298) | 69.4 (22.0-141.8) | 65.9 (43.5-94.5) |
| Durango | 180 (139-225) | 251 (195-322) | 381 (272-508) | 51.6 (12.7-97.5) | 48.9 (35.0-65.3) |
| Guanajuato | 484 (399-659) | 783 (657-1107) | 1214 (867-1745) | 55.1 (15.9-114.9) | 51.4 (36.8-73.5) |
| Guerrero | 440 (341-672) | 799 (655-1179) | 989 (770-1424) | 23.8 (0.6-58.4) | 69.4 (54.2-101.6) |
| Hidalgo | 225 (185-313) | 379 (321-553) | 599 (425-901) | 58.1 (18.2-110.1) | 44.5 (31.7-66.8) |
| Jalisco | 913 (619-1049) | 1412 (1000-1662) | 2027 (1400-2702) | 43.5 (6.5-89.5) | 60.6 (41.8-80.1) |
| Mexico | 1003 (844-1401) | 1731 (1478-2546) | 2807 (2071-4226) | 62.2 (26.0-108.6) | 44.6 (33.1-67.5) |
| Mexico City | 1303 (858-1523) | 1636 (1256-2137) | 2529 (1797-3517) | 54.6 (18.0-99.4) | 55.7 (39.9-77.1) |
| Michoacan | 548 (375-655) | 765 (583-970) | 1161 (804-1566) | 51.8 (14.2-99.7) | 53.3 (36.9-72.0) |
| Morelos | 186 (152-248) | 284 (239-403) | 416 (294-595) | 46.3 (7.8-95.4) | 45.8 (32.5-65.8) |
| Nayarit | 153 (102-180) | 272 (183-322) | 412 (259-568) | 51.2 (8.2-107.7) | 71.4 (44.9-98.4) |
| Nuevo Leon | 553 (426-699) | 868 (684-1133) | 1361 (990-1925) | 56.8 (18.5-103.3) | 62.3 (45.6-87.7) |
| Oaxaca | 311 (260-459) | 498 (419-778) | 668 (490-1069) | 34.2 (2.7-76.8) | 33.8 (24.7-54.0) |
| Puebla | 414 (355-597) | 643 (541-982) | 896 (643-1369) | 39.4 (3.8-79.1) | 36.1 (26.1-54.9) |
| Queretaro | 123 (103-167) | 207 (173-295) | 351 (251-524) | 70.1 (27.4-124.3) | 46.3 (33.4-68.7) |
| Quintana Roo | 51 (42-74) | 108 (89-160) | 200 (145-302) | 85.4 (39.1-147.1) | 44.5 (32.6-68.4) |
| San Luis Potosi | 272 (205-343) | 404 (321-528) | 604 (442-850) | 49.4 (12.6-105.6) | 46.5 (34.0-65.3) |
| Sinaloa | 444 (300-513) | 728 (518-857) | 1221 (807-1695) | 67.8 (21.1-128.6) | 85.2 (56.7-118.1) |
| Sonora | 340 (212-397) | 529 (337-619) | 798 (499-1088) | 50.8 (14.9-100.2) | 63.0 (39.7-85.5) |
| Tabasco | 207 (132-242) | 338 (241-396) | 484 (332-644) | 43.1 (8.1-90.0) | 50.2 (34.6-66.6) |
| Tamaulipas | 411 (311-497) | 639 (471-783) | 986 (685-1360) | 54.3 (12.8-103.1) | 67.3 (47.3-92.2) |
| Tlaxcala | 80 (66-132) | 124 (101-207) | 191 (133-312) | 53.9 (13.1-103.4) | 37.3 (26.0-61.0) |
| Veracruz | 890 (622-1040) | 1363 (1033-1661) | 1988 (1451-2610) | 45.8 (11.4-90.2) | 49.9 (36.5-65.6) |
| Yucatan | 191 (159-292) | 293 (245-464) | 410 (288-653) | 39.8 (4.5-80.1) | 41.6 (29.4-66.2) |
| Zacatecas | 183 (148-245) | 277 (228-366) | 397 (284-552) | 43.3 (5.7-93.3) | 53.7 (38.4-75.1) |

ASR = Age-standardized rate.

**Supplementary Table 2.** Estimates of prostate cancer mortality at the national and subnational levels in Mexico.

| **Deaths** | **Counts (95% UI)** | | | **Percentage change counts 2010 to 2019** | **ASR (per 100,000)** |
| --- | --- | --- | --- | --- | --- |
| 2000 | 2010 | 2019 | 2019 |
| **National** | 4812 (3795-6138) | 6864 (5674-9075) | 9256 (7077-12678) | 34.8 (13.0-62.0) | 19.4 (14.8-26.7) |
| Aguascalientes | 39 (32-52) | 61 (47-77) | 85 (63-114) | 39.0 (9.7-71.4) | 19.6 (14.6-26.4) |
| Baja California | 103 (64-117) | 147 (103-174) | 228 (153-295) | 55.5 (22.6-92.9) | 21.3 (14.4-27.4) |
| Baja California Sur | 20 (13-23) | 31 (23-37) | 53 (34-73) | 69.9 (31.1-124.9) | 24.2 (16.1-33.0) |
| Campeche | 28 (24-42) | 45 (38-66) | 59 (43-90) | 29.4 (1.2-62.4) | 16.0 (11.8-24.6) |
| Chiapas | 157 (108-197) | 263 (174-301) | 377 (244-488) | 43.4 (15.0-78.1) | 20.8 (13.5-26.6) |
| Chihuahua | 160 (111-183) | 220 (156-266) | 295 (193-392) | 34.2 (5.5-68.0) | 23.7 (15.7-31.3) |
| Coahuila | 114 (88-138) | 156 (126-207) | 217 (160-300) | 39.2 (10.7-74.0) | 19.3 (14.3-26.9) |
| Colima | 31 (22-37) | 47 (34-56) | 69 (44-97) | 46.7 (13.9-98.8) | 25.5 (16.4-35.5) |
| Durango | 79 (61-103) | 109 (87-142) | 136 (98-183) | 25.0 (-2.5-57.3) | 17.6 (12.6-23.7) |
| Guanajuato | 215 (178-289) | 312 (262-447) | 421 (307-603) | 35.0 (3.3-75.3) | 19.1 (14.0-27.5) |
| Guerrero | 215 (165-353) | 354 (297-540) | 378 (302-580) | 6.9 (-10.4-30.2) | 29.8 (23.7-46.9) |
| Hidalgo | 98 (82-151) | 149 (126-222) | 208 (152-329) | 39.4 (9.0-76.7) | 15.9 (11.7-25.3) |
| Jalisco | 397 (275-445) | 537 (385-609) | 701 (489-904) | 30.6 (3.4-62.8) | 22.8 (16.0-29.5) |
| Mexico | 391 (340-558) | 614 (525-914) | 909 (681-1368) | 48.0 (17.6-85.4) | 16.9 (12.6-25.7) |
| Mexico City | 510 (348-593) | 608 (474-800) | 810 (587-1120) | 33.1 (5.3-65.3) | 19.7 (14.3-27.2) |
| Michoacan | 252 (178-301) | 337 (257-440) | 441 (317-588) | 30.9 (3.5-66.4) | 19.6 (14.1-26.1) |
| Morelos | 74 (62-101) | 111 (92-157) | 152 (112-224) | 36.5 (6.9-74.2) | 17.9 (13.2-26.3) |
| Nayarit | 64 (45-75) | 104 (72-120) | 140 (89-185) | 34.6 (4.7-77.3) | 24.6 (15.5-32.4) |
| Nuevo Leon | 181 (143-233) | 263 (210-353) | 364 (269-508) | 38.8 (7.8-71.2) | 18.8 (14.0-26.0) |
| Oaxaca | 160 (134-246) | 241 (199-391) | 309 (227-497) | 28.1 (3.1-61.7) | 15.1 (11.0-24.3) |
| Puebla | 211 (179-305) | 290 (244-447) | 373 (277-583) | 28.5 (2.3-60.3) | 15.7 (11.6-24.6) |
| Queretaro | 51 (43-70) | 79 (66-111) | 118 (88-173) | 50.4 (18.7-89.5) | 18.4 (13.7-26.5) |
| Quintana Roo | 18 (15-27) | 36 (30-55) | 61 (45-95) | 68.7 (31.9-115.7) | 17.6 (13.2-27.8) |
| San Luis Potosi | 126 (97-165) | 177 (140-238) | 235 (173-329) | 32.7 (3.2-72.6) | 18.0 (13.2-25.1) |
| Sinaloa | 157 (107-178) | 221 (162-260) | 316 (216-426) | 43.1 (9.1-84.7) | 23.1 (15.9-31.0) |
| Sonora | 127 (80-143) | 185 (121-211) | 244 (161-318) | 32.1 (2.5-64.5) | 22.3 (14.9-29.1) |
| Tabasco | 86 (55-98) | 129 (94-148) | 173 (119-222) | 34.0 (4.8-66.0) | 19.6 (13.5-25.2) |
| Tamaulipas | 135 (109-174) | 207 (155-256) | 277 (199-372) | 33.8 (5.4-65.7) | 20.2 (14.5-27.0) |
| Tlaxcala | 36 (30-61) | 53 (42-90) | 70 (50-119) | 33.1 (5.6-71.2) | 14.2 (10.2-24.2) |
| Veracruz | 402 (295-499) | 534 (412-678) | 729 (531-980) | 36.6 (10.3-72.4) | 19.1 (13.9-25.7) |
| Yucatan | 84 (71-131) | 118 (101-186) | 152 (112-241) | 28.4 (2.8-60.5) | 16.8 (12.5-26.9) |
| Zacatecas | 87 (70-118) | 127 (102-177) | 156 (115-214) | 23.0 (-4.3-61.0) | 20.3 (14.9-27.9) |

ASR = Age-standardized rate.

**Supplementary Table 3.** Estimates of DALYs due to prostate cancer at the national and subnational levels in Mexico.

| **DALYs** | **Counts (95% UI)** | | | **Percentage change counts 2010 to 2019** | **ASR (per 100,000)** |
| --- | --- | --- | --- | --- | --- |
| 2000 | 2010 | 2019 | 2019 |
| **National** | 85401 (66271-105182) | 118808 (96913-157677) | 161552 (122755-219505) | 35.9 (14.0-64.0) | 319.5 (244.1-432.5) |
| Aguascalientes | 685 (564-892) | 1043 (819-1329) | 1503 (1125-2023) | 44.0 (15.3-76.8) | 316.8 (238.6-425.8) |
| Baja California | 2029 (1221-2295) | 2862 (1941-3301) | 4452 (2963-5737) | 55.6 (23.0-92.7) | 352.0 (240.3-449.4) |
| Baja California Sur | 377 (254-440) | 586 (418-701) | 1041 (677-1465) | 77.6 (36.9-137.2) | 406.1 (265.7-568.0) |
| Campeche | 505 (425-734) | 769 (660-1113) | 1008 (751-1524) | 31.2 (3.2-64.9) | 264.6 (196.4-400.9) |
| Chiapas | 2781 (1844-3314) | 4443 (2960-5118) | 6261 (4119-8075) | 40.9 (11.3-76.2) | 320.7 (211.3-412.1) |
| Chihuahua | 3006 (2046-3374) | 3980 (2724-4701) | 5402 (3363-7240) | 35.7 (6.5-70.1) | 401.1 (252.0-533.7) |
| Coahuila | 2117 (1585-2528) | 2779 (2241-3651) | 3912 (2878-5261) | 40.8 (11.2-75.9) | 320.5 (236.8-435.3) |
| Colima | 542 (392-634) | 795 (583-938) | 1215 (800-1711) | 52.9 (18.3-108.0) | 405.1 (265.4-566.4) |
| Durango | 1359 (1043-1721) | 1811 (1449-2347) | 2302 (1666-3098) | 27.1 (-1.4-59.0) | 296.5 (214.0-399.0) |
| Guanajuato | 3720 (3100-4986) | 5239 (4472-7483) | 7237 (5313-10306) | 38.1 (5.8-82.6) | 312.1 (229.9-442.8) |
| Guerrero | 3814 (3038-5968) | 6181 (5175-8955) | 6764 (5446-9764) | 9.4 (-7.6-34.4) | 487.4 (391.4-718.2) |
| Hidalgo | 1716 (1426-2410) | 2551 (2203-3688) | 3559 (2648-5481) | 39.5 (8.8-78.4) | 267.7 (199.5-413.5) |
| Jalisco | 6720 (4644-7622) | 9019 (6501-10305) | 11953 (8344-15353) | 32.5 (5.3-64.9) | 366.1 (255.7-468.9) |
| Mexico | 7486 (6486-10687) | 11362 (9835-16772) | 16765 (12513-24857) | 47.6 (18.1-83.8) | 278.8 (209.6-414.3) |
| Mexico City | 9029 (6061-10362) | 10607 (8109-13746) | 14415 (10320-19695) | 35.9 (9.0-68.7) | 326.9 (234.7-445.1) |
| Michoacan | 4213 (2950-4950) | 5392 (4053-6864) | 7094 (5165-9411) | 31.6 (2.6-68.6) | 323.5 (234.9-429.1) |
| Morelos | 1328 (1111-1746) | 1881 (1590-2641) | 2588 (1919-3746) | 37.6 (8.2-76.5) | 290.3 (215.7-419.6) |
| Nayarit | 1095 (747-1265) | 1757 (1176-1994) | 2377 (1475-3143) | 35.2 (4.7-78.7) | 413.9 (256.7-546.4) |
| Nuevo Leon | 3350 (2618-4241) | 4819 (3818-6307) | 6684 (4993-9225) | 38.7 (9.4-70.3) | 317.7 (238.2-439.7) |
| Oaxaca | 2761 (2335-4089) | 3886 (3284-6070) | 4855 (3560-7591) | 24.9 (-0.1-58.4) | 243.2 (178.2-379.7) |
| Puebla | 3631 (3146-5219) | 4883 (4208-7429) | 6290 (4696-9626) | 28.8 (2.2-62.0) | 256.3 (191.4-393.9) |
| Queretaro | 926 (776-1271) | 1379 (1181-1969) | 2117 (1585-3152) | 53.5 (21.5-92.8) | 291.6 (218.1-428.6) |
| Quintana Roo | 357 (300-528) | 691 (587-1049) | 1187 (884-1809) | 71.9 (34.3-121.1) | 284.0 (213.7-435.5) |
| San Luis Potosi | 2123 (1604-2731) | 2871 (2265-3803) | 3804 (2805-5274) | 32.5 (2.7-74.4) | 291.7 (214.9-405.4) |
| Sinaloa | 2791 (1888-3155) | 3935 (2812-4538) | 5715 (3780-7643) | 45.2 (11.4-88.4) | 405.9 (270.0-540.0) |
| Sonora | 2384 (1500-2688) | 3378 (2196-3807) | 4521 (2908-5901) | 33.8 (4.6-65.5) | 372.3 (240.7-483.2) |
| Tabasco | 1539 (985-1748) | 2259 (1625-2566) | 2993 (2077-3884) | 32.5 (4.3-64.8) | 318.2 (221.0-412.7) |
| Tamaulipas | 2540 (1973-3120) | 3674 (2727-4488) | 4956 (3510-6660) | 34.9 (6.4-69.2) | 346.7 (246.8-461.4) |
| Tlaxcala | 624 (518-1016) | 871 (717-1458) | 1197 (882-1963) | 37.5 (9.9-77.3) | 236.5 (174.5-389.1) |
| Veracruz | 7012 (4970-8244) | 9147 (6894-11335) | 12303 (8808-16371) | 34.5 (8.7-70.0) | 312.5 (223.6-413.4) |
| Yucatan | 1424 (1208-2194) | 1958 (1679-3085) | 2582 (1915-4103) | 31.9 (5.4-64.6) | 267.1 (198.9-426.8) |
| Zacatecas | 1419 (1153-1895) | 2001 (1637-2650) | 2500 (1850-3408) | 25.0 (-2.0-62.5) | 334.2 (247.4-454.3) |

ASR = Age-standardized rate.
